# Supplementary material
Source: publisher figshare collection journal article supplement (https://acs.figshare.com/ndownloader/files/9036313)
Supplement: Supplementary file 1 [file 9036313]

## Supporting Information

### **Mesoporous ZrO<sub>2</sub> Nanoframes for Biomass Upgrading**

*Haiqing Wang,<sup>†</sup> Hao Chen,<sup>‡</sup> Bing Ni,<sup>†</sup> Kai Wang,<sup>†</sup> Ting He,<sup>†</sup> Yulong Wu,<sup>\*§</sup> and Xun Wang<sup>\*†</sup>*

<sup>†</sup> Key Lab of Organic Optoelectronics and Molecular Engineering, Department of Chemistry, Tsinghua University, Beijing 100084, China.

<sup>‡</sup> Department of Chemical Engineering, School of Chemical Engineering and Technology, Xi'an jiaotong University, Xi'an 710049, China.

<sup>§</sup> Institute of Nuclear and New Energy Technology, Tsinghua University, Beijing 100084, China.

Corresponding Author:

\* Xun Wang E-mail: wangxun@mail.tsinghua.edu.cn

\* Yulong Wu E-mail: wulong@tsinghua.edu.cn

Table S1. Physicochemical properties of catalysts Ni/ZrO<sub>2</sub>-F, Ni/ZrO<sub>2</sub>-H, and Ni/ZrO<sub>2</sub>-C.

| Catalysts              | Ni loading<br>(wt%) <sup>a</sup> | Ni/Zr <sup>b</sup> | S <sub>BET</sub><br>(m <sup>2</sup> /g) <sup>c</sup> |
|------------------------|----------------------------------|--------------------|------------------------------------------------------|
| Ni/ZrO <sub>2</sub> -C | 9.9                              | 0.14               | 39.8                                                 |
| Ni/ZrO <sub>2</sub> -H | 10.0                             | 0.12               | 54.8                                                 |
| Ni/ZrO <sub>2</sub> -F | 9.9                              | 0.11               | 56.5                                                 |

a) Determined by ICP. b) XPS result. c) N<sub>2</sub> physisorption result.

Table S2. Catalytic performance of different catalysts over octanoic acid conversion<sup>a</sup>

| Catalysts              | Conversion<br>/% | Yields /% |        |         |        |
|------------------------|------------------|-----------|--------|---------|--------|
|                        |                  | Heptane   | Octane | octanol | Others |
| Blank                  | 4.9              | 0.0       | 0.0    | 0.8     | 4.1    |
| ZF-C                   | 19.6             | 4.3       | 1.2    | 6.9     | 7.2    |
| Ni/ZrO <sub>2</sub> -C | 54.2             | 38.7      | 6.6    | 3.2     | 5.6    |
| Ni/ZrO <sub>2</sub> -H | 86.4             | 70.3      | 6.9    | 2.6     | 6.3    |
| Ni/ZrO <sub>2</sub> -F | 100.0            | 86.0      | 8.0    | 3.1     | 2.8    |

<sup>a</sup> Reaction conditions: octanoic acid (1 g), decane (100 ml), catalyst (0.1 g), 330 °C, 3 MPa H<sub>2</sub> and 4 h.

Table S3. Catalytic performance of different catalysts over stearic acid conversion<sup>a</sup>

| Catalysts              | Conversion<br>/% | Yields /% |        |         |        |
|------------------------|------------------|-----------|--------|---------|--------|
|                        |                  | Heptane   | Octane | octanol | Others |
| Ni/ZrO <sub>2</sub> -C | 48.1             | 38.6      | 5.8    | 1.5     | 2.2    |
| Ni/ZrO <sub>2</sub> -H | 80.3             | 69.5      | 7.8    | 1.3     | 1.7    |
| Ni/ZrO <sub>2</sub> -F | 100.0            | 89.3      | 7.1    | 1.2     | 2.4    |

<sup>a</sup> Reaction conditions: stearic acid (1 g), dodecane (100 ml), catalyst (0.1 g), 260 °C, 3 MPa H<sub>2</sub> and 6 h.

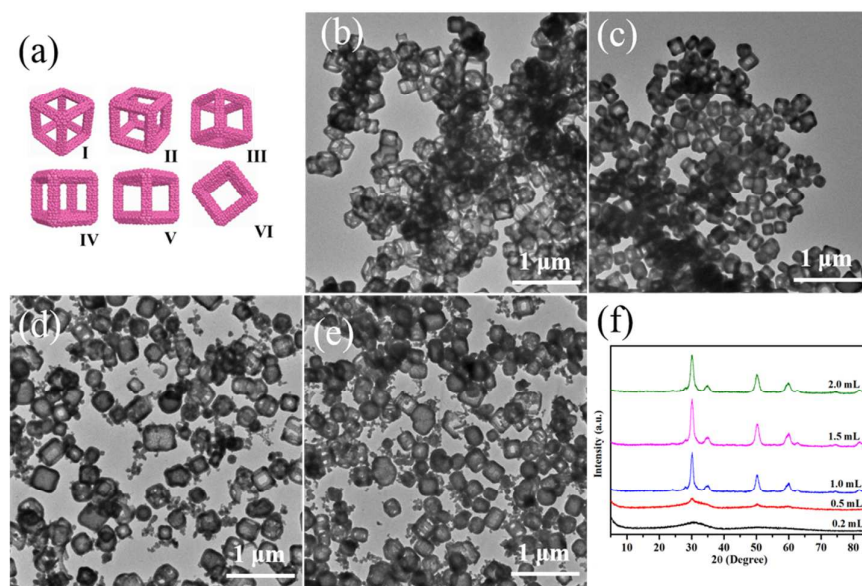

Figure S1. a) Models of ZrO<sub>2</sub> nanoframes (ZFs) with different perspectives, b-e) TEM images of ZFs with varied amounts of ammonia (0.2, 1.0, 1.5, and 2.0 mL), and f) their corresponding XRD patterns.

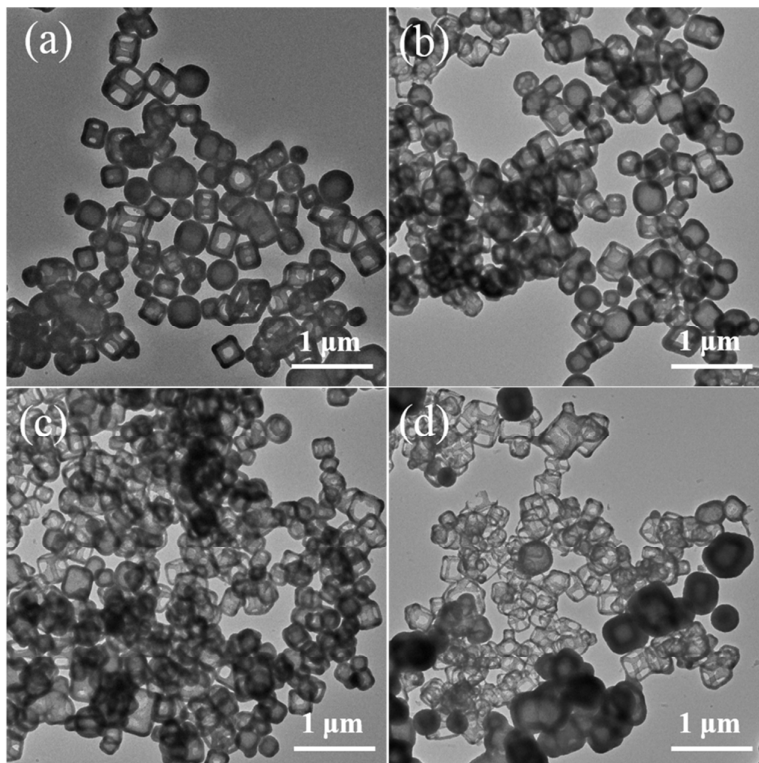

Figure S2. TEM images of ZFs with varied reaction time a) 2 h, b) 8 h, c) 16 h and d) 24 h, respectively.

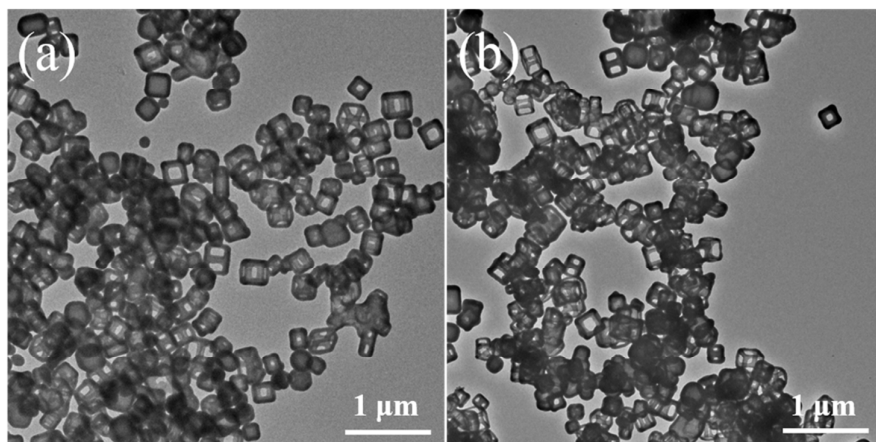

Figure S3. TEM images of ZFs with varied reaction temperatures a) 120 and b) 180 °C.

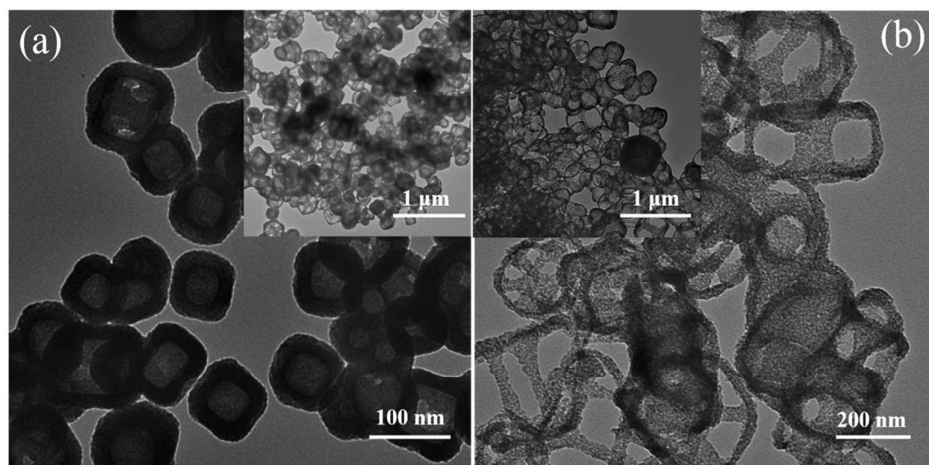

Figure S4. Manipulated size and facet of ZFs with a) cyclohexane and b) hexane.



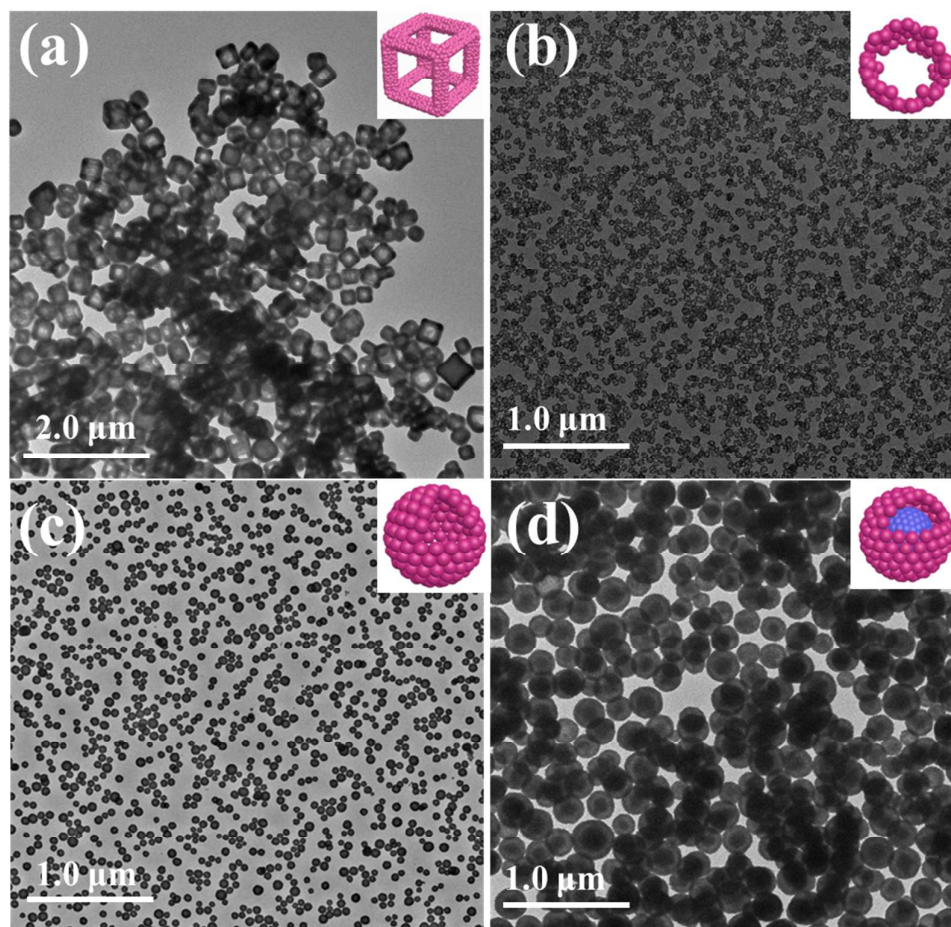

Figure S5. Low-magnification TEM images of a) ZrO<sub>2</sub> nanoframes, b) hollow ring, c) sphere, and d) core-shell in big-scale.

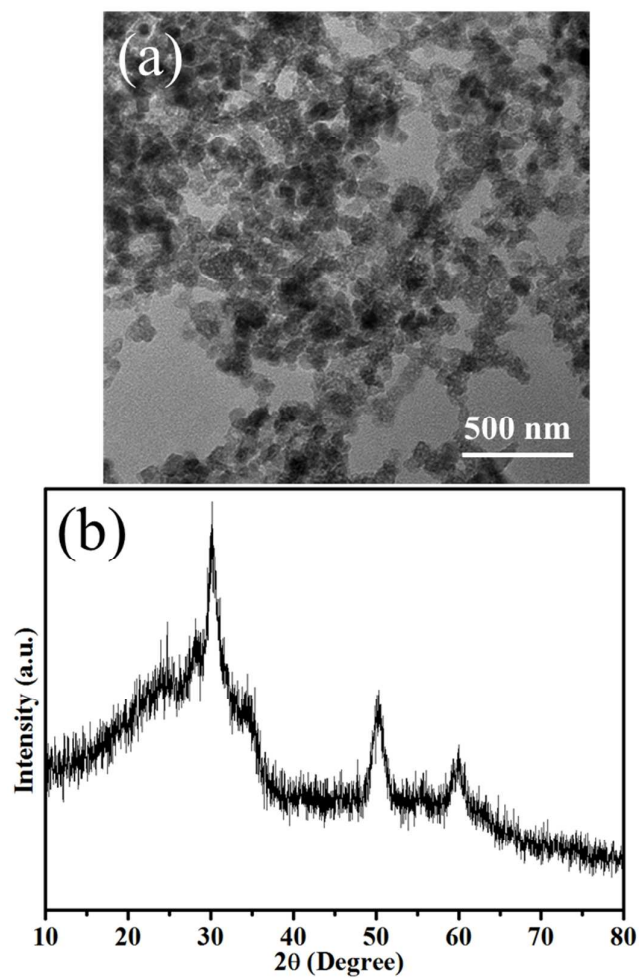

Figure S6. a) TEM image and b) XRD pattern of  $\text{ZrO}_2$  nanoparticles synthesized with  $\text{ZrCl}_4$  as zirconium source.

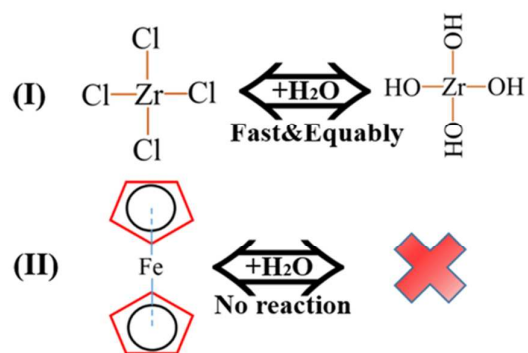

Figure S7. General hydrolysis processes of  $\text{ZrCl}_4$  (I) and ferrocene (II).

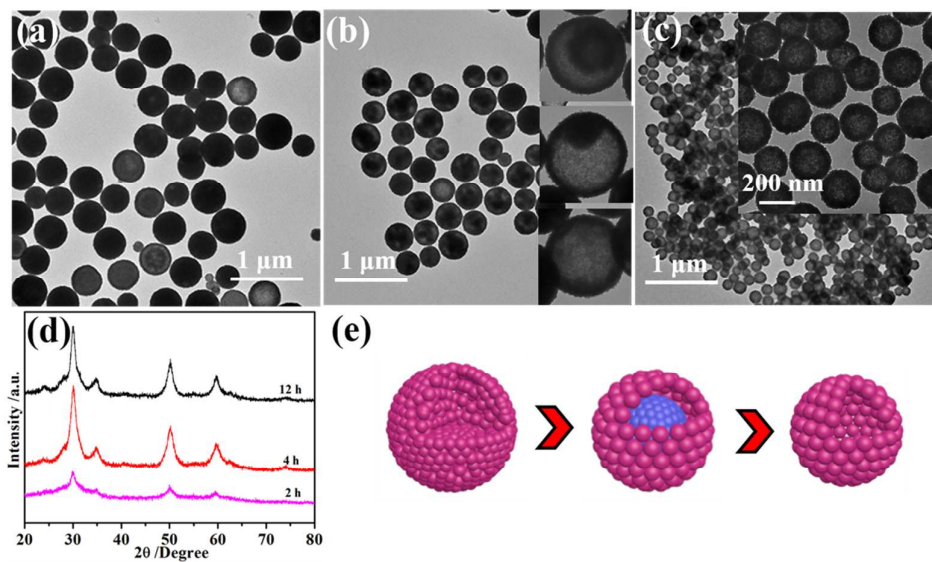

Figure S8. a-c) TEM images of time-dependent intermediates for ZrO<sub>2</sub> hollow sphere (2h, 4h and 12h), d) their corresponding XRD patterns, and e) models of structural transformation.

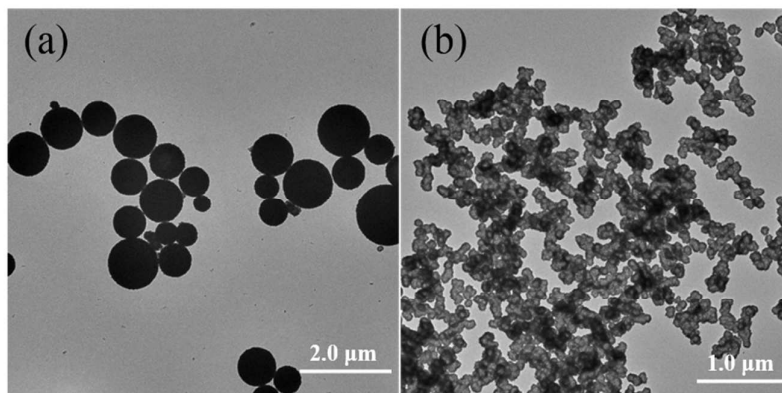

Figure S9. TEM images of  $\text{ZrO}_2$  nanostructures synthesized with the same amounts of a) water and b) NaOH replacing ammonia.

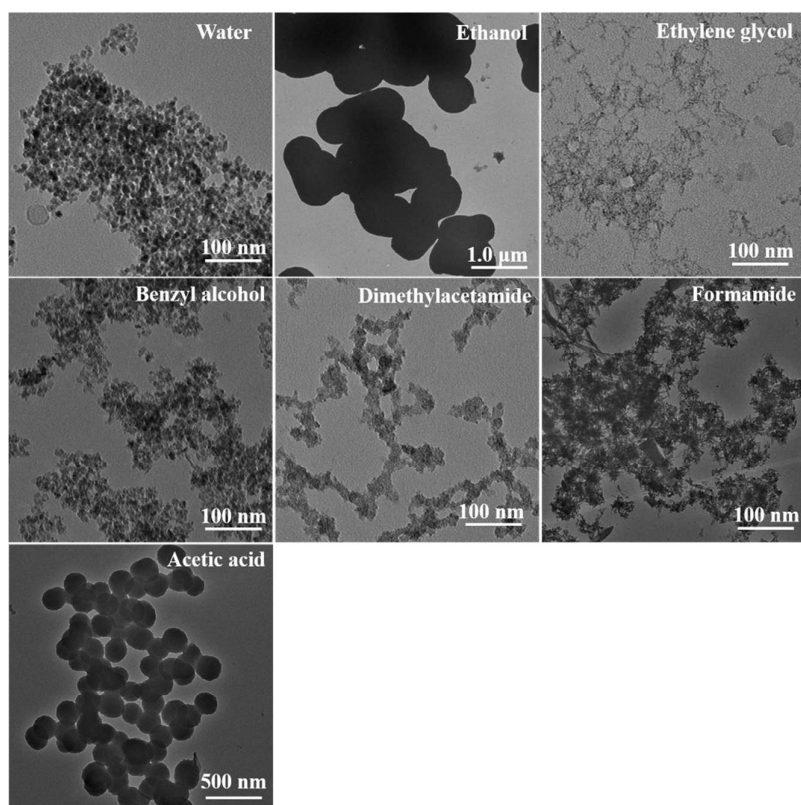

Figure S10. TEM images of ZrO<sub>2</sub> nanostructures synthesized with other kinds of solvents.

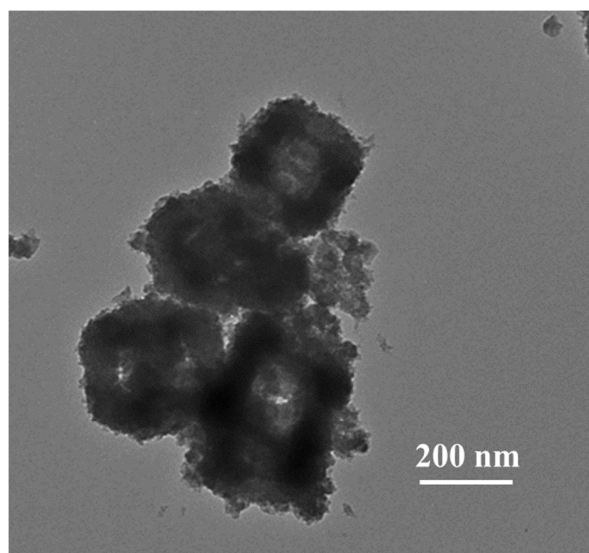

Figure S11. TEM image of ZF intermediate after water watching.

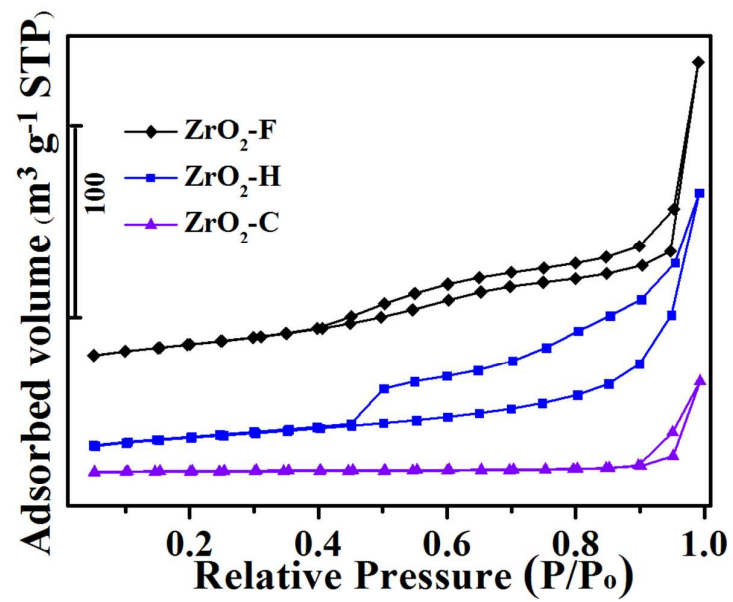

Figure S12. Nitrogen physisorption curves for ZrO<sub>2</sub>-F, ZrO<sub>2</sub>-H, and ZrO<sub>2</sub>-C calcined at 500 °C for 2 h before Ni impregnation.



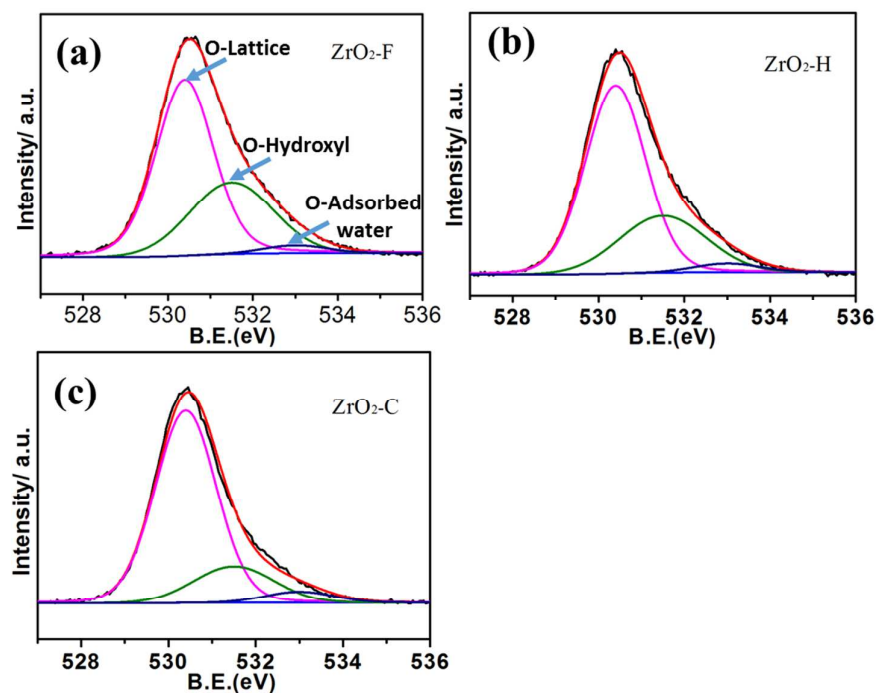

Figure S13. XPS results of (a) ZrO<sub>2</sub>-F, (b) ZrO<sub>2</sub>-H and (c) ZrO<sub>2</sub>-C (Oxygen-lattice, 530.4 eV; Oxygen-hydroxyl, 531.5 eV; Oxygen-adsorbed water, 533 eV)

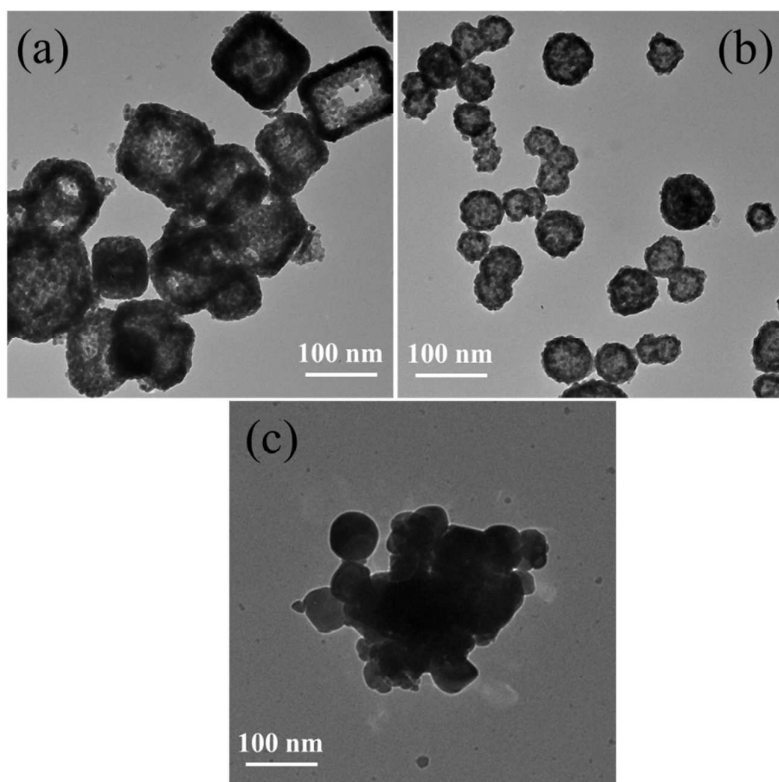

Figure S14. TEM images of a) Ni/ZrO<sub>2</sub>-F, b) Ni/ZrO<sub>2</sub>-H and c) Ni/ZrO<sub>2</sub>-C catalysts.

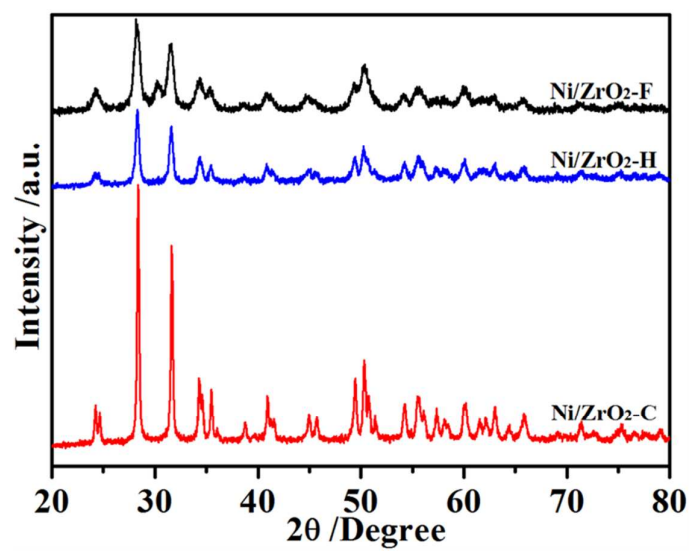

Figure S15. XRD patterns of Ni/ZrO<sub>2</sub>-F, Ni/ZrO<sub>2</sub>-H and Ni/ZrO<sub>2</sub>-C catalysts.

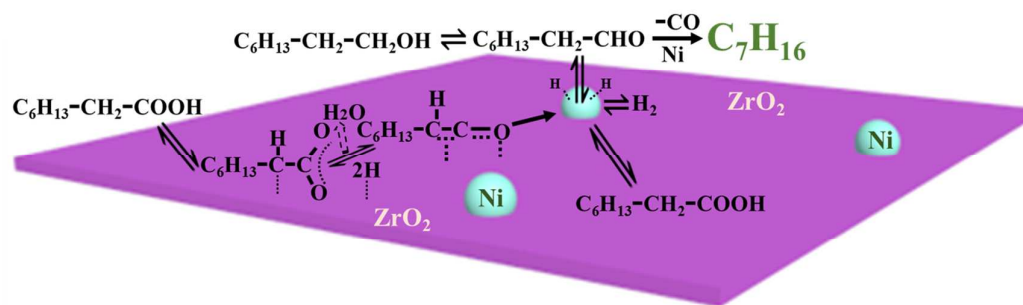

Figure S16. The possible reaction process of upgrading bioacids into alkanes. Reproduced with permission from ref 1. Copyright 2012 American Chemical Society.

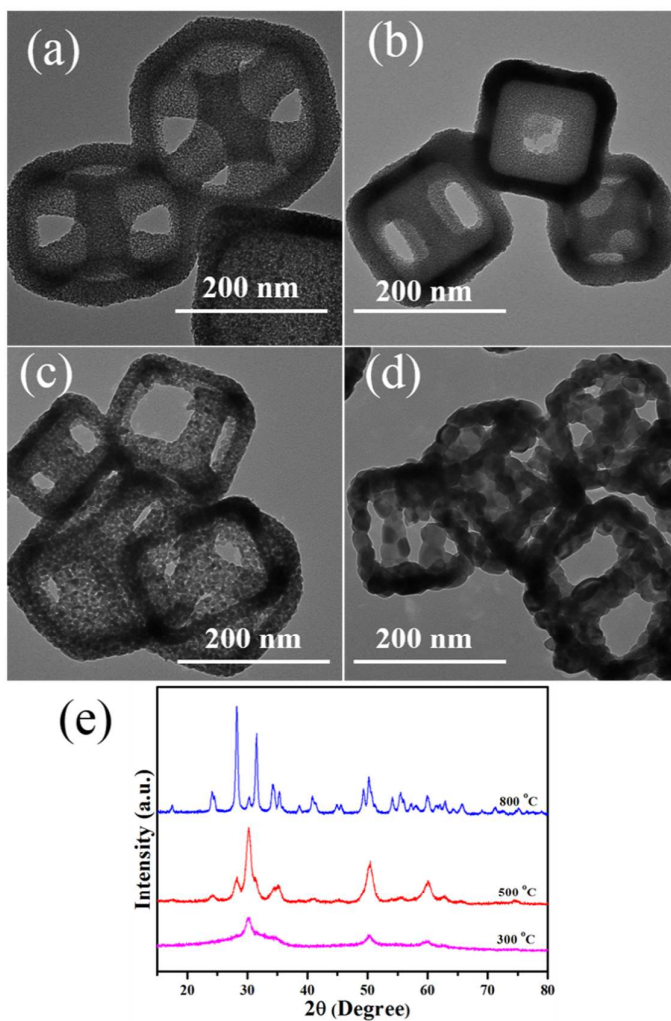

Figure S17. TEM images of ZFs calcined with different temperatures for 2 h, a) 300 °C, b) 400 °C, c) 500 °C, and d) 800 °C, and e) their corresponding XRD patterns.

#### Reference

1. Peng, B.; Yuan, X.; Zhao, C.; Lercher, J. A., Stabilizing Catalytic Pathways Via Redundancy: Selective Reduction of Microalgae Oil to Alkanes. *J. Am. Chem. Soc.* **2012**, *134*, 9400-9405.
